# Supplementary material
Source: PubMed Central journal article supplement (PMC2846159)
Supplement: ddq018_1.pdf [file ddq018_1.pdf]

**Supplemental Tables****Supplemental Table S1** Combined ranks created from Illumina and Affymetrix genome-wide expression analysis on YAC128 and control mice at 24 months of age.

| Rank | Gene name                                                                                 | Gene symbol   | Illumina probe                               | Affymetrix probe | Illu rank | Affy rank | Combined rank |
|------|-------------------------------------------------------------------------------------------|---------------|----------------------------------------------|------------------|-----------|-----------|---------------|
| 1    | Wilms tumor 1 homolog                                                                     | Wt1           | scl022431.11_253-S                           | 1425995_s_at     | 1         | 1         | 1             |
| 2    | netrin G1                                                                                 | Ntng1         | scl0080883.1_122-S                           | 1449286_at       | 2         | 27        | 14            |
| 3    | transducer of ERBB2, 2                                                                    | Tob2          | scl0057259.2_60-S                            | 1448667_x_at     | 24        | 55        | 40            |
| 4    | protocadherin 20                                                                          | Pcdh20        | scl00219257.2_313-S                          | 1424701_at       | 62        | 20        | 41            |
| 5    | Scm-like with four mbt domains 2                                                          | Sfmbt2        | scl21295.26.802_230-S                        | 1434353_at       | 12        | 155       | 84            |
| 6    | pogo transposable element with KRAB domain                                                | Pogk          | ri C230043G09 PX00174<br>N19 AK048752 3011-S | 1459896_at       | 104       | 144       | 124           |
| 7    | aspartoacylase (aminoacylase) 3                                                           | Acy3          | scl52796.6.1_4-S                             | 1448539_a_at     | 71        | 203       | 137           |
| 8    | ArfGAP with FG repeats 2                                                                  | Hrbl (Agfg2)  | scl25869.12_138-S                            | 1441347_at       | 245       | 32        | 137           |
| 9    | polymerase (RNA) II (DNA directed) polypeptide A                                          | Polr2a        | scl40020.28_128-S                            | 1426242_at       | 204       | 83        | 138           |
| 10   | von Willebrand factor C domain-containing protein 2-like                                  | Vwc21         | scl00320460.2_251-S                          | 1440413_at       | 182       | 109       | 146           |
| 11   | DNA-damage-inducible transcript 4-like                                                    | Ddit4l        | scl22560.5_561-S                             | 1439332_at       | 291       | 2         | 146           |
| 12   | OTU domain containing 7B                                                                  | Otu7b         | scl0229603.11_13-S                           | 1429139_at       | 196       | 150       | 156           |
| 13   | CD82 antigen                                                                              | Cd82          | scl012521.1_26-S                             | 1416401_at       | 89        | 305       | 173           |
| 14   | ATP-binding cassette, sub-family A (ABC1), member 6                                       | Abca6         | scl0001569.1_1-S                             | 1453817_at       | 309       | 167       | 174           |
| 15   | protein kinase C, theta                                                                   | Prkcq         | scl0003216.1_934-S                           | 1426044_a_at     | 410       | 68        | 197           |
| 16   | RAB GTPase activating protein 1-like                                                      | Rabgap11      | scl0029809.2_171-S                           | 1429196_at       | 432       | 56        | 206           |
| 17   | zinc finger protein 157                                                                   | Zfp157        | scl0072154.1_145-S                           | 1452945_at       | 138       | 356       | 238           |
| 18   | phosphoserine aminotransferase 1                                                          | Psat1         | scl52691.13_82-S                             | 1451064_a_at     | 451       | 67        | 238           |
| 19   | contactin 2                                                                               | Cntn2         | scl021367.1_30-S                             | 1456962_at       | 584       | 52        | 239           |
| 20   | protocadherin alpha 4                                                                     | Pcdha4        | scl52062.1.1_324-S                           | 1420429_at       | 322       | 438       | 244           |
| 21   | sulfotransferase family 2A, DHEA-preferring, member 1                                     | Sult2a1       | GI_38086373-S                                | 1419528_at       | 338       | 262       | 247           |
| 22   | ATP-binding cassette, sub-family C (CFTR/MRP), member 4                                   | Abcc4         | ri A830027H05 PX00154<br>E24 AK043744 1727-S | 1454408_at       | 583       | 105       | 259           |
| 23   | family with sequence similarity 3, member C                                               | Fam3c         | scl29247.11.6_29-S                           | 1448904_at       | 508       | 195       | 318           |
| 24   | CD59a antigen                                                                             | Cd59a         | scl00333883.1_4-S                            | 1418710_at       | 178       | 659       | 352           |
| 25   | CD59b antigen                                                                             | Cd59b         | scl00333883.1_4-S                            | 1418710_at       | 178       | 659       | 418           |
| 26   | sulfotransferase family 2A, DHEA-preferring, member 2                                     | Sult2a2       | scl075142.2_189-S                            | 1419528_at       | 481       | 413       | 418           |
| 27   | zinc finger protein 446                                                                   | Zfp446        | scl0269870.3_40-S                            | 1439025_at       | 533       | 364       | 447           |
| 28   | LIM domain containing preferred translocation partner in lipoma                           | Lpp           | GI_38081184-S                                | 1438597_x_at     | 770       | 138       | 448           |
| 29   | mortality factor 4 like 1                                                                 | Morf4l1       | GI_38081184-S                                | 1438597_x_at     | 770       | 138       | 454           |
| 30   | RAD52 motif 1                                                                             | Rdm1          | scl40876.7.1_108-S                           | 1417661_at       | 528       | 379       | 454           |
| 31   | family with sequence similarity 5, member C                                               | Fam5c         | scl075142.2_189-S                            | 1446809_at       | 481       | 439       | 460           |
| 32   | RIKEN cDNA 0610010F05 gene                                                                | 0610010F05RIK | scl0001343.1_24-S                            | 1456660_a_at     | 33        | 899       | 460           |
| 33   | spermatid perinuclear RNA binding protein                                                 | Strbp         | ri D330022O09 PX00093P<br>17 AK021286 1503-S | 1421125_at       | 510       | 450       | 466           |
| 34   | tyrosine 3-monooxygenase/tryptophan 5-monooxygenase activation protein, theta polypeptide | Ywhaq         | scl022630.1_91-S                             | 1460621_x_at     | 874       | 90        | 482           |
| 35   | zinc finger protein 644                                                                   | Zfp644        | scl0003996.1_126-S                           | 1439769_at       | 284       | 703       | 494           |
| 36   | ring finger protein 32                                                                    | Rnf32         | GI_38081184-S                                | 1455742_x_at     | 770       | 228       | 499           |
| 37   | tetraspanin 2                                                                             | Tspan2        | scl0070747.2_23-S                            | 1424567_at       | 803       | 211       | 507           |
| 38   | tribbles homolog 3                                                                        | Trib3         | scl18503.5_29-S                              | 1456225_x_at     | 387       | 644       | 511           |
| 39   | NPC1-like 1                                                                               | Npc1l1        | scl40543.19.1_28-S                           | 1438514_at       | 267       | 775       | 516           |
| 40   | leucine rich repeat containing 50                                                         | Lrrc50        | ri 4833436O22 PX00028P<br>19 AK029441 2683-S | 1421974_at       | 197       | 851       | 521           |

Genes were ranked based on p-values and assigned to probes using Gemma (22) and Illumina and Affymetrix provided annotations. In the case multiple probes were targeting a specific gene we only

included the probe with the lowest p-value and highest rank for that specific gene. We calculated the combined rank for each gene by averaging the individual ranks obtained from the Affymetrix and the Illumina platform, respectively.

**Supplemental Table S2** Combined ranks created from Illumina and Affymetrix genome-wide expression analysis on YAC128 and control mice at 12 months of age.

| Rank | Gene name                                                       | Gene symbol      | Illumina probe                           | Affymetrix probe | Illu rank | Affy rank | Combined rank |
|------|-----------------------------------------------------------------|------------------|------------------------------------------|------------------|-----------|-----------|---------------|
| 1    | myeloid/lymphoid leukemia; translocated to, 10                  | Mllt10           | scl0017354.1_147-S                       | 1444194_at       | 51        | 90        | 70            |
| 2    | surfeit gene 4                                                  | Surf4            | scl19517.6_242-S                         | 1436797_a_at     | 104       | 81        | 92            |
| 3    | actinin alpha 2                                                 | Actn2            | scl44289.22.3_135-S                      | 1448327_at       | 4         | 231       | 118           |
| 4    | forkhead box J3                                                 | Foxj3            | scl0002837.1_1-S                         | 1459055_at       | 154       | 181       | 168           |
| 5    | transportin 1                                                   | Tnpo1            | scl0320826.1_66-S                        | 1459341_at       | 103       | 316       | 210           |
| 6    | dimethylarginine dimethylaminohydrolase 1                       | Ddah1            | GI_38081067-S                            | 1429299_at       | 48        | 425       | 236           |
| 7    | NEDD4 binding protein 1                                         | N4bp1            | scl34522.1.1_225-S                       | 1455606_at       | 366       | 218       | 292           |
| 8    | WAP four-disulfide core domain 1                                | Wfdc1            | ri 9030625A11 PX00025F06 AK018575 782-S  | 1431335_a_at     | 117       | 562       | 340           |
| 9    | zinc finger and SCAN domain containing 5B                       | Zfp371 (Zscan5b) | scl0170734.1_214-S                       | 1449543_at       | 391       | 302       | 346           |
| 10   | protein phosphatase 1, regulatory subunit 9A                    | Ppp1r9a          | scl30419.24_421-S                        | 1432037_at       | 242       | 469       | 356           |
| 11   | RIKEN cDNA A530023O14 gene                                      | A530023O14Rik    | scl00244183.1_117-S                      | 1444179_at       | 635       | 95        | 365           |
| 12   | mitogen-activated protein kinase kinase kinase 12               | Map3k12          | scl0026404.1_188-S                       | 1438908_at       | 300       | 444       | 372           |
| 13   | cAMP responsive element modulator                               | Crem             | scl0002242.1_3-S                         | 1418322_at       | 281       | 523       | 402           |
| 14   | calcium channel, voltage-dependent, $\alpha 2/\Delta$ subunit 1 | Cacna2d1         | scl012293.44_74-S                        | 1441608_at       | 379       | 487       | 433           |
| 15   | LOC628308                                                       | LOC628308        | GI_38077065-S                            | 1427174_at       | 432       | 440       | 436           |
| 16   | zinc finger protein 260                                         | Zfp260           | scl0026466.2_245-S                       | 1427831_s_at     | 827       | 60        | 444           |
| 17   | LOC432823                                                       | LOC432823        | GI_38090966-S                            | 1420500_at       | 428       | 498       | 463           |
| 18   | RIKEN cDNA 1300010F03 gene                                      | 1300010F03Rik    | ri F730029G24 PL00003B03 AK089438 3826-S | 1431800_at       | 472       | 478       | 475           |
| 19   | peptidoglycan recognition protein 1                             | Pglyrp1          | ri A730072G01 PX00151H04 AK043227 1009-S | 1449184_at       | 179       | 773       | 476           |
| 20   | tripartite motif-containing 14                                  | Trim14           | scl0074735.2_104-S                       | 1436199_at       | 590       | 427       | 508           |
| 21   | prolylcarboxypeptidase                                          | Prcp             | ri 2610104A14 ZX00061A19 AK011816 791-S  | 1444419_at       | 580       | 501       | 540           |
| 22   | NIPA-like domain containing 3                                   | Nipal3           | ri E230003H01 PX00208F16 AK053937 2624-S | 1434315_at       | 1009      | 84        | 546           |
| 23   | sigma non-opioid intracellular receptor 1                       | Sigmar1          | scl0002696.1_5-S                         | 1451956_a_at     | 706       | 385       | 546           |
| 24   | regulatory factor X, 4                                          | Rfx4             | scl0071137.2_208-S                       | 1436931_at       | 890       | 216       | 553           |
| 25   | protocadherin alpha 4                                           | Pcdha4           | scl093711.1_0-S                          | 1446332_at       | 547       | 565       | 556           |
| 26   | protocadherin $\gamma$ subfamily A, 1                           | Pcdhga1          | scl093711.1_0-S                          | 1446332_at       | 547       | 565       | 556           |
| 27   | protocadherin $\gamma$ subfamily A, 2                           | Pcdhga2          | scl093711.1_0-S                          | 1446332_at       | 547       | 565       | 556           |
| 28   | protocadherin $\gamma$ subfamily A, 3                           | Pcdhga3          | scl093711.1_0-S                          | 1446332_at       | 547       | 565       | 556           |
| 29   | runt-related transcription factor 1                             | Runx1t1          | GI_38078080-S                            | 1444615_x_at     | 498       | 657       | 578           |
| 30   | neurofascin                                                     | Nfasc            | scl000893.1_11-S                         | 1459357_at       | 1217      | 14        | 616           |
| 31   | phosphodiesterase 4A, cAMP specific                             | Pde4a            | ri 6530402D11 PX00649G05 AK078339 1262-S | 1457408_at       | 238       | 1013      | 626           |
| 32   | roundabout homolog 1                                            | Robo1            | ri A530006L21 PX00139F22 AK040651 2419-S | 1454565_at       | 897       | 364       | 630           |
| 33   | Tp53rk binding protein                                          | Tprkb            | scl0001238.1_35-S                        | 1425410_at       | 1097      | 204       | 650           |
| 34   | zinc finger protein 458                                         | Zfp458           | GI_38074875-S                            | 1445824_at       | 1039      | 260       | 650           |
| 35   | predicted gene 2026                                             | Gm2026           | scl076958.5_244-S                        | 1427174_at       | 873       | 440       | 656           |
| 36   | RIKEN cDNA 2210418O10 gene                                      | 2210418O10Rik    | scl076958.5_244-S                        | 1427174_at       | 873       | 440       | 656           |
| 37   | zinc finger, CCHC domain containing 6                           | Zcchc6           | scl0003616.1_4-S                         | 1444421_at       | 1213      | 103       | 658           |
| 38   | protein phosphatase 1, regulatory (inhibitor) subunit 2         | Ppp1r2           | ri 4833447I12 PX00313B20 AK076545 2034-S | 1447706_at       | 1289      | 46        | 668           |
| 39   | zinc finger protein 644                                         | Zfp644           | scl0003996.1_126-S                       | 1439769_at       | 736       | 600       | 668           |
| 40   | regulator of G-protein signaling 9                              | Rgs9             | ri 6030456M03 PX00314P15 AK077945 3443-S | 1426033_at       | 1067      | 299       | 683           |

Genes were ranked based on p-values and assigned to probes using Gemma (22) and Illumina and Affymetrix provided annotations. In the case multiple probes were targeting a specific gene we only included the probe with the lowest p-value and highest rank for that specific gene. We calculated the combined rank for each gene by averaging the individual ranks obtained from the Affymetrix and the Illumina platform, respectively.

**Supplemental Table S3**

Primers used in qPCR for quantification of striatal mRNA from YAC128 and controls

| <b>Gene symbol</b> | <b>Forward primer</b>        | <b>Reverse primer</b>       |
|--------------------|------------------------------|-----------------------------|
| <i>Pcdh20</i>      | GAGCCAACATCATAGGAAGGTAGAATCT | GATGGAGCCCAAGCTTATGACT      |
| <i>Tob2</i>        | GTTCTTGGAGAAATCGCCCTTT       | GGAAGGGCTGGTTGGGATA         |
| <i>Wt1</i>         | AAGGACACGACTGTGGATCTACATC    | TTCCGGCAAACCTGATAGGA        |
| <i>Ddit4l</i>      | GCAGCGCCTAGGGAAAGAT          | CTCAAACCTGCCCGTTGCAA        |
| <i>Hrbl</i>        | CTGAGCCTGAAGTCCTGTTCT        | GGTATCAACGATGTCCGAGCAT      |
| <i>Polr2a</i>      | CAGGACACTGGACCGCTCAT         | GCATAATATTCTCAGAGACTCCCTTCA |
| <i>Sfmbt2</i>      | AACTCATCCTCCTCTTTGGAAAAG     | CAGGTTGGTATCTTCTCTGAGTAAA   |
| <i>Pogk</i>        | GAGACTGTCCTGTCCCTGGAATT      | CTGGAGTCCTAAAGTCAGATTCTTCA  |
| <i>Acy3</i>        | CCTCACCTTCCTTGGTTCCA         | GCAGGTCTAGGGTAAAGTCAAAAAGC  |
| <i>DMPK</i>        | TGCATGGCCTTCAGAGACAA         | GCCACTAGGTCAGCCTCTTCA       |
| <i>Dleu7</i>       | TCCCTGTCCACCTGAAGGATA        | TGGTGAGCGGCATTCAAGT         |
| <i>Gsg1l</i>       | GGAGGACTGGAGACCACACTCTT      | CCATGCAGCAGGTGAAGGA         |
| <i>Ntng1</i>       | CACAACACTAGAGGGCAGCA         | TTTAGGCCCTGTTGTTCCAG        |
| <i>Dzip1l</i>      | TGCAGGCATGGCAGATGT           | TCCCCTTGGGTCCACTTGA         |
| <i>Dok3</i>        | GCACGTAAAGTTTGGCAAGAAAT      | TCACGCACGTCCCAGCTT          |
| <i>Rab21</i>       | TGTGGGAGCCAAGCATTACC         | CCTGGGCTGTCTCTATCATTCTTTTA  |
| <i>Spata5</i>      | TCCAGGTCCAGCCTCTTTTG         | TTGTCCTCAGCGCCAAGTC         |
| <i>Entpd7</i>      | AAAAGGAAACGGAGGTGACAGA       | ACGGAGAAACGGGCTCACT         |
| <i>Grasp</i>       | GCAGTACCTTAAGCAAACCTGTAC     | TTTACCACCAGGCCATGTA         |
| <i>Slc45a3</i>     | GACACTATGATGAAGGCATTTCGAA    | TCTGTACCAGCCTGTCCATGAC      |
| <i>Rtel1</i>       | CTTTCTCGAAACATGAAACAGCAA     | TGCGCCTTACGACTCTTAGCA       |
| <i>Rgag4</i>       | GCCCATGTGCACACACTTG          | CATCACCATGAGCTCTCCATGT      |
| <i>Ddc</i>         | TCCCCAGAGTTCACACAAGCT        | ATGCGCCTGATCAGATGTGTAA      |
| <i>Usmg5</i>       | GGGTTCCGACGAAGATTGAC         | TGAACTGGAATTGGCCATCA        |
| <i>Mllt10</i>      | CCAGAAGGTCACAAGACTTAGTGATAA  | GGCGAGTTCCTGGCCATTTT        |
| <i>Surf4</i>       | GAAGAAGAAAGAGTGGTAACACACAGA  | CACAAACGCCGGCAGTTT          |
| <i>Foxj3</i>       | CCAAGGATGATCCCGGAAA          | ATGGAGTTGAGGCCCGTTCT        |
| <i>Actn2</i>       | GCGCAGGAGCTCAATGAACT         | CTATCCCCTGGTCGCAAATTT       |
| <i>Tnpo1</i>       | TTTATGATTGTGGCTCTTGACTTACTC  | TTTATCCTGCATGCACTGGTACA     |
| <i>Ddah1</i>       | CGCAAAGGTCTATGAGAAACTCAA     | AGCCGTCCACCTTTTCCAT         |
| <i>Wfdc1</i>       | GCTCTGAGTTTCCTGTTGCTACTG     | AACCTCTTCAGCTCGGGACTT       |
| <i>Ppp1r9a</i>     | CGGATGAGAGCCTGGATATGAT       | GCCCGATTCTGACTCTGAGTGT      |
| <i>N4bp1</i>       | CGAGAACCTCCCCAGTAATCAG       | TGCTGCGTGGGCTTCAAC          |
| <i>Rplo</i>        | TGGGCATCACCACGAAAAT          | ATCAGCTGCACATCACTCAGAATT    |
| <i>Hprt1</i>       | CGTCGTGATTAGCGATGATGA        | TCCAAATCCTCGGCATAATGA       |
| <i>Rn18s</i>       | AGAAACGGCTACCACATCCAA        | GGGTGCGGAGTGGGTAATTT        |
| <i>B2m</i>         | TCTCACTGACCGGCCTGTATG        | TGGGTGGCGTGAGTATACTTGA      |
| <i>Actb</i>        | CCAGCCTTCCTTCTTGGGTAT        | TGTGTTGGCATAGAGGTCTTTACG    |
| <i>Gapdh</i>       | AACTTTGGCATTGTGGAAGG         | ACACATTGGGGGTAGGAACA        |

**Supplemental Table S4**

Primers used in qPCR for quantification of caudate mRNA from HD cases and controls.

| <b>Gene symbol</b> | <b>Forward primer</b>      | <b>Reverse primer</b>     |
|--------------------|----------------------------|---------------------------|
| <i>WT1</i>         | CGCCCTACAGCAGTGACAATT      | TTAAGGTGGCTCCTAAGTTCATCTG |
| <i>DDIT4L</i>      | AACCCGGCCAGCATTTC          | TCCCAGTAGTCAAATCACTTAGCA  |
| <i>GSG1L</i>       | ACTTCCGGGAGAGGATGGA        | TGGTGTCTGGGCAGGGTAT       |
| <i>SLC45A3</i>     | TCGGCCAGGATCTGAGTGAT       | CCGCCAACTGCCTAGGAAT       |
| <i>DZIL1L</i>      | GCAAGAGTGGACCAAACCTTTATGG  | TGCCCCGAGTTTCTCTTCTAG     |
| <i>PCDH20</i>      | CACAAATCTCAATAGAACCGACTCA  | AGAGCTACTAAGGTGGGCATACAAG |
| <i>SFMBT2</i>      | TCGGCTCAGCTAATGGAAATG      | AAGCCAGTTTCTCCAAGCTT      |
| <i>ACY3</i>        | AGCTGCAGGACCGAGACTTC       | CCGTGGACTCTCCCTCATAGAG    |
| <i>POLR2A</i>      | TCTGCACAAAATGTCCATGATG     | CGGAGTTGTCACTAAGATTCAAG   |
| <i>ACTN2</i>       | CGATGGAGCACATTCGTGTT       | TTCGCATCTCTCGTCAGGATCT    |
| <i>DDAH1</i>       | TTTAAGGACTATGCAGTCTCCACAGT | AGCCATGCTGCAGAACTCTTC     |
| <i>PPP1R9A</i>     | CCATCAGAACTGGACACAAGCA     | GCCTGCAGCTTGGTCTTCA       |
| <i>DMPK</i>        | CATCGTGGTGAGGCTTAAGGA      | CACTACCGCTACCTCGCTGAA     |
| <i>GSG1L</i>       | ACTTCCGGGAGAGGATGGA        | TGGTGTCTGGGCAGGGTAT       |
| <i>RGAG4</i>       | GGACAGCGCCCAACATTG         | CTGGCTACCCTTTAGGCAACA     |
| <i>HPRT1</i>       | TTATGGACAGGACTGAACGTCTTG   | GCACACAGAGGGCTACAATGTG    |
| <i>PGK-1</i>       | CAAATGGAACACGGAGGATAAAG    | CTTTACCTTCCAGGAGCTCCAA    |
| <i>ACTB</i>        | AGTACTCCGTGTGGATCGGC       | GCTGATCCACATCTGCTGGA      |
| <i>GAPDH</i>       | GAAGGTGAAGGTCGGAGTC        | GAAGATGGTGTGATGGGATTTC    |
| <i>B2M</i>         | AATATAAGTGGAGGCGTCGCGC     | TAAGGCCACGGAGCGAGACATC    |
| <i>18S RNA</i>     | CGCCGCTAGAGGTGAAATTC       | TTGGCAAATGCTTTCGCTC       |

## Supplemental Figures and Figure legends

### Supplemental Figure S1

| WT | YAC128 | Affymetrix Name                                                             | Symbol               | Probe        | P-value  | Fold change |
|----|--------|-----------------------------------------------------------------------------|----------------------|--------------|----------|-------------|
|    |        | Wilms tumor homolog                                                         | <i>Wt1</i>           | 1425995_s_at | 2.10E-06 | 0.76        |
|    |        | DNA-damage-inducible transcript 4-like                                      | <i>Ddit4l</i>        | 1439332_at   | 2.89E-06 | -1.16       |
|    |        | dystrophia myotonica-protein kinase                                         | <i>Dmpk</i>          | 1434944_at   | 1.51E-05 | -0.35       |
|    |        | GSG1-like                                                                   | <i>Gsg1l</i>         | 1436013_at   | 1.54E-05 | -0.53       |
|    |        | deleted in lymphocytic leukemia, 7                                          | <i>Dleu7</i>         | 1442180_at   | 2.15E-05 | 0.62        |
|    |        | spermatogenesis associated 5                                                | <i>Spata5</i>        | 1438844_x_at | 4.14E-05 | 0.48        |
|    |        | deiodinase, iodothyronine type III, opposite strand                         | <i>Dio3os</i>        | 1435121_at   | 5.64E-05 | -0.24       |
|    |        | ectonucleoside triphosphate diphosphohydrolase 7                            | <i>Entpd7</i>        | 1435625_at   | 5.72E-05 | -0.43       |
|    |        | GRP1 (general receptor for phosphoinositides 1)-associated scaffold protein | <i>Grasp</i>         | 1441894_s_at | 9.11E-05 | -0.39       |
|    |        | solute carrier family 45, member 3                                          | <i>Slc45a3</i>       | 1426663_s_at | 1.02E-04 | 1.06        |
|    |        | regulator of telomere elongation helicase 1                                 | <i>Rtel1</i>         | 1435516_x_at | 1.02E-04 | -0.14       |
|    |        | cleft lip and palate associated transmembrane protein 1                     | <i>Ciptm1</i>        | 1441083_at   | 1.32E-04 | -0.43       |
|    |        | G protein-coupled receptor 101                                              | <i>Gpr101</i>        | 1441382_at   | 1.35E-04 | 1.54        |
|    |        | tyrosine kinase, non-receptor, 2                                            | <i>Tnk2</i>          | 1448298_at   | 1.79E-04 | -0.43       |
|    |        | Leucine rich repeat containing 49                                           | <i>Lrrc49</i>        | 1445486_at   | 2.00E-04 | -0.20       |
|    |        | G protein-coupled receptor 153                                              | <i>Gpr153</i>        | 1426973_at   | 2.45E-04 | -0.68       |
|    |        | RIKEN cDNA BB336256 gene                                                    | <i>BB336256Rik</i>   | 1436092_at   | 2.51E-04 | -1.65       |
|    |        | MAS-related GPR, member B1                                                  | <i>Mrgprb1</i>       | 1437529_at   | 2.71E-04 | -0.18       |
|    |        | RIKEN cDNA BB667665 gene                                                    | <i>BB667665Rik</i>   | 1444415_at   | 2.84E-04 | -0.26       |
|    |        | protocadherin 20                                                            | <i>Pcdh20</i>        | 1424701_at   | 2.96E-04 | 1.11        |
|    |        | reticulum 3                                                                 | <i>Rtn3</i>          | 1443220_at   | 3.03E-04 | -0.35       |
|    |        | PITPNM family member 3                                                      | <i>Pitpnm3</i>       | 1455140_at   | 3.03E-04 | -0.40       |
|    |        | phospholipase C-like 4                                                      | <i>Picl4</i>         | 1441587_at   | 3.26E-04 | -0.20       |
|    |        | heparan sulfate (glucosamine) 3-O-sulfotransferase 3A1                      | <i>Hs3st3a1</i>      | 1435622_at   | 3.28E-04 | -0.28       |
|    |        | programmed cell death 6 interacting protein                                 | <i>Pdcd6ip</i>       | 1426184_a_at | 3.93E-04 | 0.19        |
|    |        | ankyrin repeat domain 15                                                    | <i>Ankrd15</i>       | 1433742_at   | 4.06E-04 | 0.31        |
|    |        | netrin G1                                                                   | <i>Ntng1</i>         | 1449286_at   | 4.64E-04 | 0.80        |
|    |        | G-protein signalling modulator 1 (AGS3-like, C. elegans)                    | <i>Gpsm1</i>         | 1423689_a_at | 5.25E-04 | -0.37       |
|    |        | hypothetical LOC676575                                                      | <i>LOC676575</i>     | 1454312_at   | 5.59E-04 | -0.12       |
|    |        | G-protein coupled receptor 85                                               | <i>Gpr85</i>         | 1424897_at   | 5.66E-04 | 0.19        |
|    |        | ubiquitin specific peptidase 25                                             | <i>Usp25</i>         | 1448939_at   | 5.67E-04 | 0.29        |
|    |        | HIV-1 Rev binding protein-like                                              | <i>Hrbl</i>          | 1441347_at   | 6.04E-04 | -0.20       |
|    |        | ribonuclease, RNase A family 4                                              | <i>Rnase4</i>        | 1422603_at   | 6.13E-04 | -0.67       |
|    |        | cholecystokinin A receptor                                                  | <i>Cckar</i>         | 1421195_at   | 6.36E-04 | 0.26        |
|    |        | RIKEN cDNA D630029P09 gene                                                  | <i>D630029P09Rik</i> | 1455468_at   | 6.57E-04 | -0.48       |
|    |        | TBCC domain containing 1                                                    | <i>Tbccd1</i>        | 1436752_at   | 6.82E-04 | 0.34        |
|    |        | beta-1,4-N-acetyl-galactosaminyl transferase 2                              | <i>B4galnt2</i>      | 1421522_at   | 6.83E-04 | 0.26        |
|    |        | Usher syndrome 2A (autosomal recessive, mild) homolog (human)               | <i>Ush2a</i>         | 1445972_at   | 7.14E-04 | -0.18       |
|    |        | RIKEN cDNA 2410089E03 gene                                                  | <i>2410089E03Rik</i> | 1443422_at   | 7.33E-04 | -0.42       |
|    |        | regulatory factor X, 3 (influences HLA class II expression)                 | <i>Rfx3</i>          | 1425413_at   | 7.58E-04 | -0.20       |

| WT | YAC128 | Illumina Name                                                              | Symbol               | Probe                 | P-value  | Fold change |
|----|--------|----------------------------------------------------------------------------|----------------------|-----------------------|----------|-------------|
|    |        | Wilms tumor homolog                                                        | <i>Wt1</i>           | scl022431.11_253-S    | 1.46E-04 | 0.20        |
|    |        | netrin G1                                                                  | <i>Ntng1</i>         | scl0080883.1_122-S    | 3.05E-04 | 0.06        |
|    |        | Rab21; member RAS oncogene family                                          | <i>Rab21</i>         | scl37488.7_270-S      | 4.60E-04 | 0.11        |
|    |        | DAZ interacting protein 1-like                                             | <i>Dzip1l</i>        | scl072507.17_285-S    | 5.35E-04 | -0.05       |
|    |        | docking protein 3                                                          | <i>Dok3</i>          | scl43920.5.585_30-S   | 8.48E-04 | -0.07       |
|    |        | Olfactory receptor 1502                                                    | <i>Olf1502</i>       | scl0258793.1_202-S    | 9.84E-04 | -0.03       |
|    |        | fibronectin type III domain containing 8                                   | <i>Fndc8</i>         | scl41151.4.1_158-S    | 1.04E-03 | -0.02       |
|    |        | weakly similar to STEROL C5-desaturase                                     | <i>D83004117Rik</i>  | riJ83004117           | 1.05E-03 | 0.02        |
|    |        | retrotransposon gag domain containing 4                                    | <i>Rgag4</i>         | scl53982.1_257-S      | 1.10E-03 | -0.16       |
|    |        | dopa decarboxylase                                                         | <i>Ddc</i>           | scl40512.21.1_20-S    | 1.22E-03 | 0.13        |
|    |        | upregulated during skeletal muscle growth 5                                | <i>Usmg5</i>         | scl0066477.1_316-S    | 1.31E-03 | -0.02       |
|    |        | Scm-like with four mbt domains 2                                           | <i>Sfmb2</i>         | scl21295.26.802_230-S | 1.42E-03 | 0.06        |
|    |        | RIKEN cDNA 5530601H04 gene                                                 | <i>5530601H04Rik</i> | scl0071445.1_39-S     | 2.08E-03 | -0.02       |
|    |        | annexin A5                                                                 | <i>Anxa5</i>         | scl011747.1_83-S      | 2.20E-03 | 0.24        |
|    |        | transmembrane protein 22                                                   | <i>Tmem22</i>        | GI_38090024-S         | 2.47E-03 | 0.17        |
|    |        | solute carrier family 47, member 1                                         | <i>Slc47a1</i>       | scl0001298.1_25-S     | 2.59E-03 | 0.03        |
|    |        | RIKEN cDNA E330009J07 gene                                                 | <i>E330009J07Rik</i> | scl29095.10_195-S     | 3.02E-03 | 0.20        |
|    |        | inhibitor of growth family, member 3                                       | <i>Ing3</i>          | scl30327.11_168-S     | 3.49E-03 | 0.05        |
|    |        | leucine rich repeat protein 1, neuronal                                    | <i>Lrrm1</i>         | scl29678.2_366-S      | 3.58E-03 | 0.25        |
|    |        | folypolyglutamyl synthetase                                                | <i>Fpgs</i>          | scl0003272.1_5-S      | 3.74E-03 | 0.03        |
|    |        | protein kinase, AMP-activated, alpha 2 catalytic subunit                   | <i>Prkaa2</i>        | GI_28545636-S         | 3.76E-03 | 0.02        |
|    |        | leucine-rich repeats and calponin homology (CH) domain containing 3        | <i>Lrch3</i>         | scl070144.7_24-S      | 3.81E-03 | 0.04        |
|    |        | molybdenum cofactor synthesis 1                                            | <i>Mocs1</i>         | riJ3110045D15         | 4.14E-03 | -0.03       |
|    |        | transducer of ERBB2, 2                                                     | <i>Tob2</i>          | scl0057259.2_60-S     | 4.23E-03 | 0.14        |
|    |        | solute carrier family 30 (zinc transporter), member 8                      | <i>Slc30a8</i>       | scl47916.2.1_25-S     | 4.37E-03 | 0.02        |
|    |        | RIKEN cDNA 1110007C09 gene                                                 | <i>1110007C09Rik</i> | scl0003702.1_48-S     | 4.42E-03 | 0.02        |
|    |        | aldo-keto reductase family 1 member B3 (aldose reductase)                  | <i>Akr1b3</i>        | scl17956.1.1_169-S    | 4.45E-03 | 0.02        |
|    |        | sema domain, transmembrane domain (TM), and cytoplasmic domain, (semaphori | <i>Sema6a</i>        | scl51424.2_347-S      | 4.89E-03 | 0.03        |
|    |        | RIKEN cDNA 1190002N15 gene                                                 | <i>1190002N15Rik</i> | GI_38089999-S         | 5.01E-03 | 0.19        |
|    |        | tubulin gamma complex associated protein 6                                 | <i>Tkbgcp6</i>       | scl00328580.1_176-S   | 5.06E-03 | -0.02       |
|    |        | Zinc finger FYVE domain containing protein 26                              | <i>Zlyve26</i>       | scl0211978.1_134-S    | 5.33E-03 | -0.06       |
|    |        | RIKEN cDNA C030037F17 gene                                                 | <i>C030037F17Rik</i> | scl35066.3.1_104-S    | 5.42E-03 | -0.03       |
|    |        | RIKEN cDNA 0610010F05 gene                                                 | <i>0610010F05Rik</i> | scl0001343.1_24-S     | 5.49E-03 | -0.02       |
|    |        | proline rich 5 like                                                        | <i>Prr5l</i>         | scl18958.13.1_24-S    | 5.64E-03 | 0.13        |
|    |        | predicted gene 7461                                                        | <i>Gm7461</i>        | riJ4930580J09         | 5.80E-03 | -0.03       |
|    |        | solute carrier family 35, member F4                                        | <i>Slc35f4</i>       | GI_38076112-S         | 5.92E-03 | 0.03        |
|    |        | preferentially expressed antigen in melanoma                               | <i>Prame</i>         | scl53822.10.1_312-S   | 5.93E-03 | 0.03        |
|    |        | cancer antigen 1                                                           | <i>Cage1</i>         | scl0003725.1_2-S      | 5.99E-03 | -0.03       |
|    |        | dynein cytoplasmic 1 intermediate chain 2                                  | <i>Dync1i2</i>       | scl20807.21.1_18-S    | 6.02E-03 | 0.10        |
|    |        | RIKEN cDNA 1700020D12 gene                                                 | <i>1700020D12Rik</i> | scl42585.2.1_143-S    | 6.12E-03 | -0.01       |

**Supplemental Figure S1** Genome-wide expression profiling of striatal mRNA from 24 month old YAC128 mice and controls using Affymetrix and Illumina beadarray platforms. Higher transcriptional expression levels are indicated by a light yellow color, while a darker brown color is corresponding to lower transcriptional expression in the heat map. Ranking is here based on p-values prior to correction for multiple comparisons. Fold change is shown as  $\log_2$  transformed values. Positive values indicate up-regulation in YAC128 compared to controls; Negative values indicate down-regulation in YAC128 compared to controls. YAC128 (n=6); wildtype littermate controls (n=4).



## Supplemental Figure S2

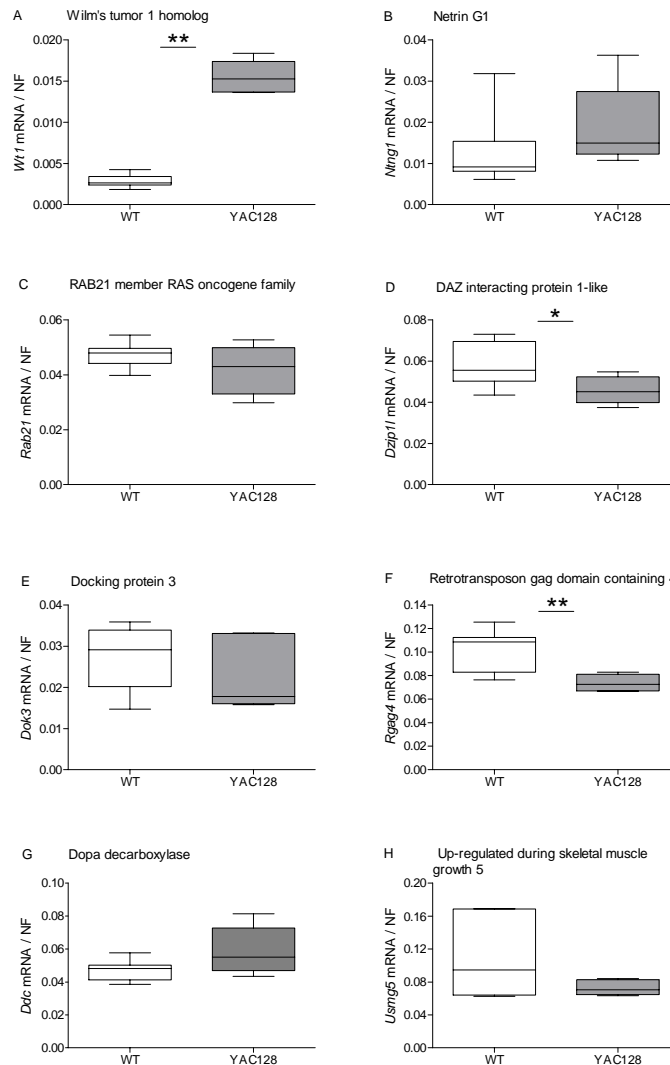

**Supplemental Figure S2** Quantification of the mRNA expression assessed by qPCR of genes identified by Illumina genome-wide expression analysis. The genes that were ranked as top ten on the Illumina platform for 24 month old YAC128 and wildtype controls (WT) were analyzed. Three of the genes were validated to be differentially expressed between YAC128 and WT. *Wt1* showed up-regulation in YAC128 compared to controls ( $p=0.0012$ ) (A). *Ntng1* (B) showed a trend for up-regulation that was not statistically significant. *Dzip1l* ( $p=0.022$ ) (D) and *Rgag4* ( $p=0.0082$ ) (F) were both down-regulated in YAC128. *Rab21* (C), *Dok3* (E), *Ddc* (G) and *Usmg5* (H) were not differentially expressed. Three different primer sets were tested for *Olfr1502* and *Fndc8*, but we were unable to amplify and quantify the expression of these genes from mouse striatal RNA. The middle line of the box and whiskers plot shows the median, the top and bottom lines show the 75<sup>th</sup> and 25<sup>th</sup> percentile, respectively. The top and bottom whiskers indicate the largest and smallest values. Statistical analysis was performed using Mann-Whitney 2-tailed U test; \*  $p<0.05$ ; \*\*  $p<0.01$ ; \*\*\*  $p<0.001$ . YAC128 (n= 7); WT (n=6)

## Supplemental Figure S3

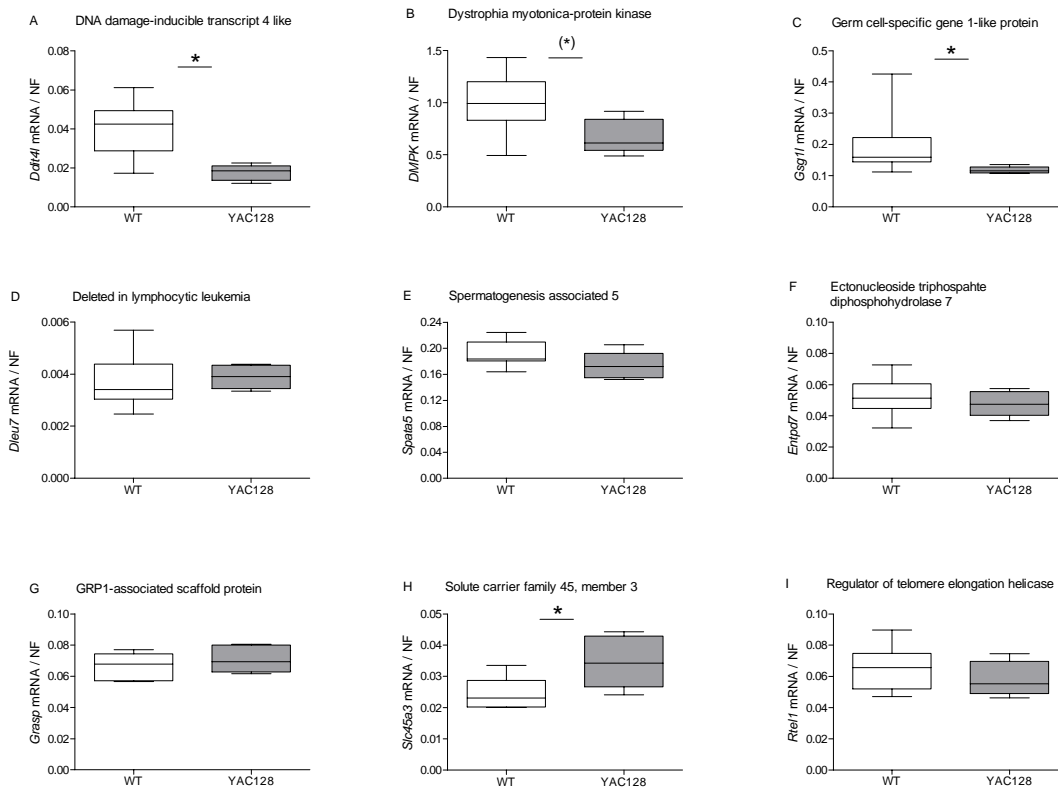

**Supplemental Figure S3** Quantification of the mRNA expression assessed by qPCR of genes identified by Affymetrix genome-wide expression analysis. The genes that were ranked as top ten on the Affymetrix platform for 24 month old YAC128 and wildtype controls (WT) were analyzed. Four of the Affymetrix genes were validated to be differentially expressed between YAC128 and WT. *Ddit4l*, *Gsg1l* and *Slc45a3* were differentially expressed, in addition to *Wt1*. *Ddit4l* ( $p=0.014$ ) (**A**) and *Gsg1l* ( $p=0.018$ ) (**C**) were down-regulated in YAC128. *Dmpk* showed a non-significant trend for down-regulation in YAC128 ( $p=0.051$ ) (**B**). *Dleu7*, *Spata5*, *Entpd7*, *Grasp* and *Rtel1* did not show differential expression between YAC128 and WT (**D-G, I**). *Slc45a3* ( $p=0.015$ ) (**H**) was up-regulated in YAC128. The middle line of the box and whiskers plot shows the median, the top and bottom lines show the 75<sup>th</sup> and 25<sup>th</sup> percentile, respectively. The top and bottom whiskers indicate the largest and smallest values. Statistical analysis was performed using Mann-Whitney 2-tailed U test; \*  $p<0.05$ ; \*\*  $p<0.01$ ; \*\*\*  $p<0.001$ . YAC128 (n= 7); WT (n=6)

## Supplemental Figure S4

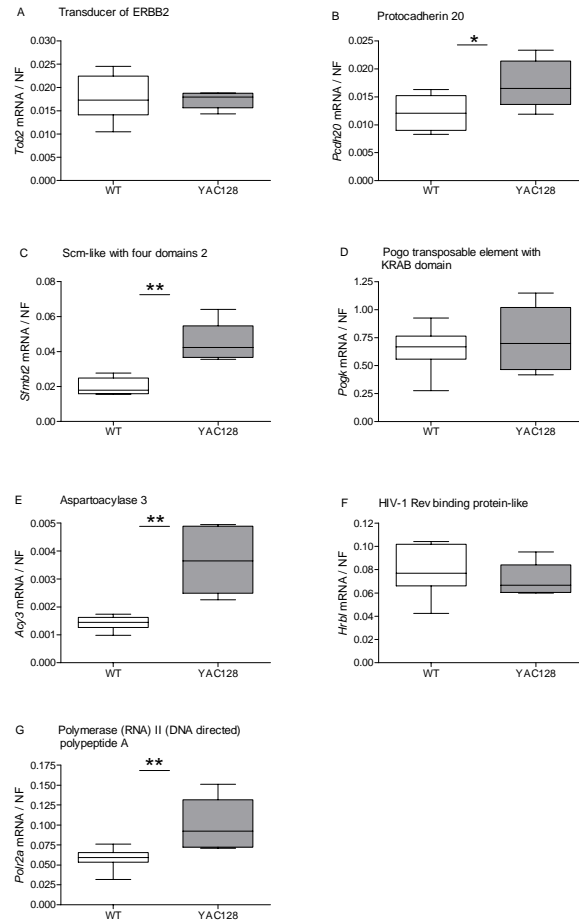

**Supplemental Figure S4** Quantification of the mRNA expression assessed by qPCR of genes from the combined rank list for the 24 month old YAC128 and controls. We created the combined rank by averaging the individual ranks on the Affymetrix and Illumina platforms. We analyzed the top ten genes from the combined rank list. In addition to *Wt1* and *Ddit4l*, four additional genes were validated to be differentially expressed in YAC128 compared to controls at 24 months of age: *Pcdh20* (p=0.035) (B), *Sfmbl2* (p=0.0012) (C), *Acy3* (p=0.0012) (E) and *Polr2a* (p=0.0047) (G). All four genes were significantly up-regulated in YAC128 compared to controls. *Tob2* (A), *Pogk* (D) and *Hrb1* (F) were not differentially expressed in YAC128 and controls at 24 months of age. The middle line of the box and whiskers plot shows the median, the top and bottom lines show the 75<sup>th</sup> and 25<sup>th</sup> percentile, respectively. The top and bottom whiskers indicate the largest and smallest values. Statistical analysis was performed using Mann-Whitney 2-tailed U test; \* p<0.05; \*\* p< 0.01; \*\*\* p<0.001. YAC128 (n= 6); WT (n=7)

## Supplemental Figure S5

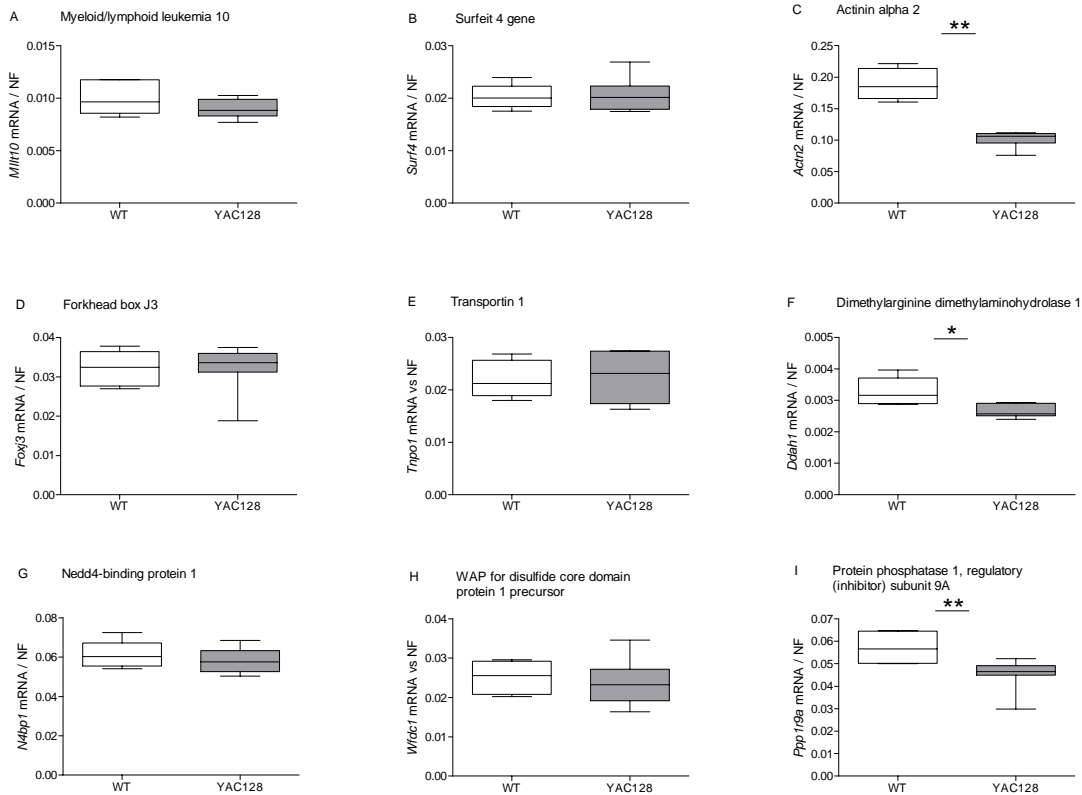

**Supplemental Figure S5** Quantification of the mRNA expression assessed by qPCR of genes from the combined rank list for the 12 month old YAC128 and controls. We created the combined rank by averaging the individual ranks on the Affymetrix and Illumina platforms. We analyzed the top ten genes from the combined rank list. Three out of ten genes were validated to be differentially expressed in YAC128 compared to controls at 12 months of age: *Actn2* ( $p=0.0012$ ) (C), *Ddah1* ( $p=0.0221$ ) (F) and *Ppp1r9a* ( $p=0.0047$ ) (I). *Mllt10* (A), *Surf4* (B), *Foxj3* (D), *Tnpo1* (E), *N4bp1* (G) and *Wfdc1* (H) were not differentially expressed. Three different primer sets were tested for *Zfp371*, but we were unable to amplify and quantify the expression of this gene from mouse striatal RNA. The middle line of the box and whiskers plot shows the median, the top and bottom lines show the 75<sup>th</sup> and 25<sup>th</sup> percentile, respectively. The top and bottom whiskers indicate the largest and smallest values. Statistical analysis was performed using Mann-Whitney 2-tailed U test; \*  $p<0.05$ ; \*\*  $p<0.01$ ; \*\*\*  $p<0.001$ . YAC128 ( $n=7$ ), WT ( $n=6$ )
